# Supplementary material for: Safety verification for polysorbate 20, pharmaceutical excipient for intramuscular administration, in Sprague-Dawley rats and New Zealand White rabbits
Source: PLoS One. 2021 Aug 27;16(8):e0256869. doi: 10.1371/journal.pone.0256869 (PMC8396741; doi:10.1371/journal.pone.0256869)
Supplement: S2 Table — (XLSX) [file pone.0256869.s002.xlsx]

## Sheet: Sheet1
	S2 Table. Individual body weights of male New Zealand White (NZW) rabbits (n: 18) in the current study.
	Animal	Group	Animal No.	Body weight (g)
				Day 1	Day 8	Day 15	Day 22	Day 29
	NZW rabbit (Male)	Vehicle control _0.9% saline (total 5 sites, n = 3)	1	2523.7	2670.4	2787.8	3073.4	3498.8
			2	2839.9	2977.6	3090.5	3201.6	3320.9
			3	2480.1	2748.5	2850.2	3116.9	3278.4
			Mean	2614.57	2798.83	2909.5	3130.63	3366.03
			SD	196.358	159.665	159.825	65.194	116.926
		Polysorbate20_0.02 mg/kg/site (total 5 site, n = 3)	1	2694.1	2778.1	2878.6	3029.2	3026
			2	2697.6	2725.9	2762.9	2881.8	2944.3
			3	2390	2513.6	2713.7	2825.4	2876.7
			Mean	2593.9	2672.53	2785.07	2912.13	2949
			SD	176.591	140.093	84.6553	105.232	74.7609
		Polysorbate20_0.1 mg/kg/site (total 5 site, n = 3)	1	2947.8	3171.1	3558	3746.1	3885.1
			2	2376.4	2626.4	2839.7	2888.2	3046.4
			3	2918.8	3024.7	3288.6	3464.3	3515.9
			Mean	2747.67	2940.73	3228.77	3366.2	3482.47
			SD	321.853	281.891	362.869	437.282	420.348
		Polysorbate20_0.4 mg/kg/site (total 5 site, n = 3)	1	2535.3	2611.3	2844.6	3109	3081.7
			2	2385.7	2508.9	2674	2864.8	2925.8
			3	2855.4	3048.2	3226.1	3336	3485.5
			Mean	2592.13	2722.8	2914.9	3103.27	3164.33
			SD	239.952	286.418	282.684	235.652	288.855
		Human serum albumin_0.06 mg/kg/site (total 5 site, n = 3)	1	2857.2	2945.4	3226.1	3394.3	3503.1
			2	2796.5	2835.5	2955.6	3020.7	3068.4
			3	2307.7	2545.3	2753.8	2904.3	3033.1
			Mean	2653.8	2775.4	2978.5	3106.43	3201.53
			SD	301.264	206.71	236.981	256.003	261.76
		Human serum albumin_0.12 mg/kg/site (total 5 site, n = 3)	1	2861.5	2955.3	3062.9	3164.7	3259.2
			2	2889.3	2871.1	2781	2802.2	2806.8
			3	2318.6	2441.6	2521.6	2673.6	2846
			Mean	2689.8	2756	2788.5	2880.17	2970.67
			SD	321.769	275.514	270.728	254.664	250.645
