# Supplementary material for: Safety verification for polysorbate 20, pharmaceutical excipient for intramuscular administration, in Sprague-Dawley rats and New Zealand White rabbits
Source: PLoS One. 2021 Aug 27;16(8):e0256869. doi: 10.1371/journal.pone.0256869 (PMC8396741; doi:10.1371/journal.pone.0256869)
Supplement: S3 Table — (XLSX) [file pone.0256869.s003.xlsx]

## Sheet: Sheet1
	S3 Table. Individual levels of hematology, clinical chemistry, serum IgE, and histamine in Sprague-Dawley (SD) rats in the current study.
	Animal	Group	Animal No.	Individual hematological findings																				Individual biochemical findings																			ELISA analysis
				RBC	HGB	HCT	MCV	MCH	MCHC	RETIC	RETIC	PLT	WBC	Differential leukocyte count										Total protein	ALB	A/G ratio	T-BIL	ALP	AST	ALT	CREA	BUN	T-CHO	TG	GLU	CA	IP	GGT	CK	Na	K	Cl	IgE	histamine
														Neut		Lymph		Mono		Eos		Baso
				(106 cells/μL)	(g/dL)	(%)	(fL)	(pg)	(g/dL)	(109 cells/μL)	(%)	(103 cells/μL)	(103 cells/μL)	(103 cells/μL)	(%)	(103 cells/μL)	(%)	(103 cells/μL)	(%)	(103 cells/μL)	(%)	(103 cells/μL)	(%)	(g/dL)	(g/dL)		(mg/dL)	(U/L)	(U/L)	(U/L)	(mg/dL)	(mg/dL)	(mg/dL)	(mg/dL)	(mg/dL)	(mg/dL)	(mg/dL)	(IU/L)	(U/L)	(mmol/L)	(mmol/L)	(mmol/L)	(ng/mL)	(ng/mL)
	SD rats (Male)	Vehicle control _0.9% saline (n = 6)	1	7.42	15.1	46.9	63.3	20.3	32.1	205.2	2.77	1170	14.53	2.48	17.1	11.39	78.4	0.29	2	0.03	0.2	0.04	0.3	6.1	3.8	1.7	0.04	507	78	21	0.44	11.9	70	92	126	10.5	9.4	0	457	143.6	4.34	101.3	0.284	0.406
			2	7.21	14.5	46.1	64	20.2	31.5	246.4	3.42	1429	8.78	1.47	16.7	6.89	78.4	0.27	3	0.07	0.8	0.02	0.2	6	4	2	0.03	695	82	23	0.44	8.9	86	88	140	10.4	9	0	582	142.5	4.75	100.9	0.213	0.591
			3	7.33	14	45.2	61.6	19.1	31	229.9	3.13	1033	10.21	1.34	13.1	8.4	82.3	0.28	2.7	0.1	1	0.02	0.1	5.9	3.9	1.9	0.04	536	100	44	0.44	13	73	62	119	10.3	9	0.57	457	141.9	4.71	100.4	0.257	0.424
			4	7.03	14.4	46.2	65.8	20.4	31	222.6	3.17	993	8.62	0.71	8.2	7.66	88.8	0.12	1.4	0.06	0.7	0.02	0.2	5.7	3.7	1.9	0.06	598	71	23	0.4	12.6	63	75	125	9.9	9.1	0.73	430	143.5	4.75	102.2	0.216	0.35
			5	7.22	14	45.5	63	19.4	30.9	221.5	3.07	1128	8.56	1.39	16.2	6.78	79.2	0.24	2.8	0.08	1	0.01	0.2	5.8	3.8	1.9	0.04	696	100	29	0.43	11.9	70	104	131	9.9	8.8	0.87	528	143.4	4.89	101.6	0.187	0.543
			6	7.98	15.1	47.9	60	18.9	31.5	186.6	2.34	1181	14.14	1.79	12.7	11.71	82.8	0.39	2.8	0.09	0.6	0.03	0.2	5.9	3.9	1.9	0.03	546	111	30	0.47	12.4	64	61	125	9.9	8.1	0.14	724	142.9	4.61	102	0.24	0.566
			Mean	7.37	14.5	46.3	63	19.7	31.3	218.7	2.98	1156	10.81	1.53	14	8.81	81.7	0.27	2.5	0.07	0.7	0.02	0.2	5.9	3.9	1.9	0.04	596	90	28	0.44	11.8	71	80	128	10.2	8.9	0.39	530	143	4.68	101.4	0.233	0.48
			SD	0.33	0.5	1	2	0.7	0.5	20.6	0.38	154	2.8	0.58	3.4	2.21	4	0.09	0.6	0.02	0.3	0.01	0.1	0.1	0.1	0.1	0.01	82	16	8	0.02	1.5	8	17	7	0.3	0.4	0.39	110	0.7	0.19	0.7	0.035	0.099
		Polysorbate20_0.02 mg/kg (n = 6)	1	7.8	15.4	48.9	62.6	19.7	31.5	225.7	2.89	1131	11.73	3.03	25.8	7.98	68.1	0.52	4.4	0.1	0.9	0.03	0.3	6.3	4	1.7	0.04	507	269	127	0.44	11.3	93	133	102	10.3	8.7	0.82	454	143.7	4.51	102	0.295	0.555
			2	7.44	14.7	46.6	62.7	19.7	31.5	193.6	2.6	1132	13.67	2.92	21.4	10.16	74.3	0.4	2.9	0.1	0.7	0.02	0.1	5.9	3.8	1.8	0.05	760	100	25	0.53	14.6	76	53	127	10.1	8.9	1	558	143.5	4.5	103	0.302	0.385
			3	7.38	14.3	45.4	61.5	19.4	31.6	207	2.8	1050	9.02	1.39	15.4	7.27	80.6	0.17	1.8	0.14	1.6	0.02	0.2	5.8	3.8	1.9	0.05	803	78	26	0.39	13	69	74	105	10.1	8.9	0.02	493	143.8	4.79	101.7	0.257	0.34
			4	6.99	13.9	44.3	63.4	19.9	31.4	188.3	2.69	1173	12.01	1.25	10.4	10.15	84.5	0.32	2.7	0.14	1.1	0.03	0.2	6.1	3.9	1.8	0.05	903	98	34	0.51	16.2	64	92	118	10.3	9.2	0	576	144.3	4.79	102.2	0.264	0.305
			5	6.97	14.2	44.9	64.5	20.4	31.7	251.6	3.61	1428	8.35	1.27	15.3	6.81	81.6	0.15	1.7	0.07	0.9	0.01	0.1	6.1	3.9	1.8	0.04	631	83	28	0.43	10.6	90	105	101	10.2	8.2	0.21	630	146.6	4.76	104.8	0.262	0.306
			6	7.72	14.9	46.8	60.7	19.3	31.9	213.1	2.76	1094	10.61	1.51	14.3	8.82	83.1	0.17	1.6	0.06	0.5	0.01	0.1	6.2	3.9	1.7	0.06	662	87	33	0.42	9.9	79	141	113	10.4	8.2	0	467	144.6	4.71	103.2	0.24	0.409
			Mean	7.38	14.6	46.2	62.6	19.7	31.6	213.2	2.89	1168	10.9	1.9	17.1	8.53	78.7	0.29	2.5	0.1	1	0.02	0.2	6.1	3.9	1.8	0.05	711	119	46	0.45	12.6	79	100	111	10.2	8.7	0.34	530	144.4	4.68	102.8	0.27	0.383
			SD	0.35	0.5	1.7	1.3	0.4	0.2	23.1	0.37	134	1.99	0.84	5.5	1.43	6.3	0.15	1.1	0.03	0.4	0.01	0.1	0.2	0.1	0.1	0.01	140	74	40	0.05	2.5	11	34	10	0.1	0.4	0.45	69	1.1	0.14	1.1	0.024	0.094
		Polysorbate20_0.1 mg/kg (n = 6)	1	7.43	14.5	45.8	61.6	19.4	31.6	257.2	3.46	1382	13.14	1.46	11.1	11.14	84.7	0.23	1.8	0.06	0.5	0.03	0.2	6.3	4	1.7	0.04	453	80	20	0.49	13.4	77	93	111	10.2	8.8	0.66	389	142.4	4.78	98.3	0.309	0.379
			2	7.48	14.8	47	62.8	19.8	31.5	251.4	3.36	1105	9.24	1.08	11.6	7.85	85	0.12	1.3	0.09	1	0.01	0.1	6.2	3.9	1.7	0.06	570	107	28	0.47	12.5	70	105	117	9.9	8.9	1.74	812	143.3	4.94	101.8	0.211	0.379
			3	6.93	13.6	42.8	61.8	19.7	31.8	238.5	3.44	1206	10.73	1.9	17.7	8.29	77.3	0.28	2.6	0.09	0.8	0.02	0.1	5.7	3.6	1.7	0.05	497	102	29	0.48	12.2	89	70	93	9.8	9.1	1.02	539	143.9	4.68	102.4	0.256	0.519
			4	7.03	13.9	44	62.5	19.7	31.5	213.9	3.04	1207	10.52	1.76	16.7	8.38	79.6	0.25	2.3	0.07	0.7	0.02	0.2	6.1	3.9	1.8	0.02	425	95	19	0.47	11.6	77	119	98	10.4	8.5	0.68	649	144	4.86	101.9	0.206	0.281
			5	7.33	14.9	47.9	65.4	20.3	31.1	185.3	2.53	1180	7.92	1.2	15.1	6.33	80	0.2	2.5	0.09	1.2	0.01	0.2	5.9	3.9	1.9	0.04	684	83	29	0.44	9.5	60	181	104	10.3	8.2	0	473	143.3	4.88	103.9	0.25	0.472
			6	7.65	15.7	47.7	62.3	20.5	32.8	208.1	2.72	885	6.53	1.25	19.1	5.1	78.1	0.13	2	0.03	0.5	0	0.1	5.6	3.7	1.9	0.03	565	89	38	0.38	12.4	85	107	98	10.2	8.3	0.05	609	144.5	4.41	100.1	0.241	0.381
			Mean	7.31	14.6	45.9	62.7	19.9	31.7	225.7	3.09	1161	9.68	1.44	15.2	7.85	80.8	0.2	2.1	0.07	0.8	0.02	0.2	6	3.8	1.8	0.04	532	93	27	0.46	11.9	76	113	104	10.1	8.6	0.69	579	143.6	4.76	101.4	0.245	0.402
			SD	0.28	0.8	2.1	1.4	0.4	0.6	27.9	0.4	163	2.32	0.33	3.3	2.06	3.3	0.06	0.5	0.02	0.3	0.01	0.1	0.3	0.2	0.1	0.01	94	11	7	0.04	1.3	10	37	9	0.2	0.4	0.65	148	0.7	0.19	1.9	0.037	0.083
		Polysorbate20_0.4 mg/kg (n = 6)	1	7.83	15.7	48.5	61.9	20	32.3	246.9	3.15	1165	7.86	0.85	10.8	6.77	86.2	0.13	1.6	0.05	0.7	0.01	0.1	6.4	3.9	1.6	0.03	497	70	29	0.43	10.2	92	148	116	10.5	8.2	0.55	296	145.1	4.59	102.4	0.198	0.406
			2	7.19	14.3	45.1	62.7	19.9	31.7	246.3	3.43	1169	9.77	1.73	17.8	7.71	78.9	0.16	1.6	0.09	0.9	0.02	0.2	5.9	3.9	1.9	0.04	603	83	22	0.47	12.9	68	88	126	10.4	8.6	0.04	416	145.3	4.91	103.9	0.203	0.421
			3	7.86	14.6	47.2	60.1	18.6	31	227.6	2.89	1200	8.17	1.41	17.2	6.42	78.5	0.19	2.3	0.11	1.4	0.02	0.2	5.9	3.9	1.9	0.04	671	78	24	0.52	12.4	58	70	142	10.2	9	0	510	143.4	4.97	101.5	0.194	0.335
			4	7.63	14.3	46	60.3	18.7	31.1	224.9	2.95	1287	9.86	1.42	14.4	8.09	82.1	0.17	1.8	0.1	1	0.03	0.3	6.1	3.9	1.8	0.02	524	101	20	0.38	8.8	72	72	88	10.1	9	0	479	144.8	5.23	103.1	0.165	0.532
			5	7.35	14.2	45.7	62.2	19.3	31.1	247.8	3.37	1352	7.12	1.02	14.3	5.86	82.3	0.12	1.7	0.07	0.9	0.01	0.1	5.9	3.8	1.8	0.03	516	81	18	0.42	9.3	83	126	102	10.4	8.9	1	577	146.2	5.06	105	0.156	0.4
			6	7.04	14.4	44.8	63.7	20.5	32.1	238.8	3.39	1087	8.56	1.95	22.7	6.33	74	0.13	1.5	0.07	0.8	0.02	0.2	5.8	3.7	1.8	0.03	652	73	24	0.42	8.9	61	77	128	10.3	9	0.44	437	146.1	4.44	102.5	0.171	0.441
			Mean	7.48	14.6	46.2	61.8	19.5	31.6	238.7	3.2	1210	8.56	1.4	16.2	6.86	80.3	0.15	1.8	0.08	1	0.02	0.2	6	3.9	1.8	0.03	577	81	23	0.44	10.4	72	97	117	10.3	8.8	0.34	453	145.2	4.87	103.1	0.181	0.422
			SD	0.34	0.6	1.4	1.4	0.8	0.6	10.2	0.24	95	1.08	0.41	4	0.86	4.2	0.03	0.3	0.02	0.2	0.01	0.1	0.2	0.1	0.1	0.01	75	11	4	0.05	1.8	13	32	19	0.1	0.3	0.4	95	1	0.3	1.2	0.02	0.065
		Human serum albumin_0.06 mg/kg (n = 6)	1	7.32	14.8	47.5	64.9	20.2	31.2	166.9	2.28	1172	6.53	1.15	17.6	5	76.5	0.22	3.4	0.1	1.5	0.02	0.2	6	3.9	1.9	0.03	658	112	26	0.44	10.6	83	104	90	9.8	9	0.53	775	145.1	5.18	103	0.266	0.607
			2	7.89	15	47	59.5	19	31.8	218.7	2.77	1181	4.13	0.65	15.8	3.23	78.3	0.15	3.7	0.04	1.1	0.01	0.2	6.2	4	1.8	0.04	629	120	28	0.4	13.3	79	73	105	9.9	8.8	0	913	143.3	4.92	99	0.189	0.352
			3	7.61	15	46.6	61.2	19.6	32.1	221	2.9	1155	9.32	1.72	18.5	7.02	75.4	0.33	3.6	0.12	1.2	0.02	0.2	6.3	4	1.7	0.02	497	91	24	0.41	11.4	52	42	109	9.9	9.3	0	584	144.4	4.88	102.4	0.218	0.417
			4	7.21	14.7	46.7	64.8	20.4	31.5	203.6	2.82	1306	6.39	1.41	22.1	4.69	73.3	0.15	2.4	0.1	1.6	0.01	0.2	6.1	4	1.9	0.03	511	106	42	0.41	10.5	57	104	89	10.4	8.8	0	695	143.1	4.94	100.7	0.191	0.651
			5	7.36	14.4	45.5	61.9	19.5	31.6	161	2.19	1253	8.28	0.62	7.5	7.42	89.6	0.1	1.1	0.04	0.5	0.01	0.2	6.3	4.1	1.9	0.03	444	94	27	0.39	11.3	72	89	100	10.2	8.9	0.24	657	145.3	4.83	101.5	0.157	0.454
			6	7.61	14.3	45.2	59.4	18.7	31.5	221.2	2.91	1302	8.22	2.18	26.5	5.7	69.3	0.19	2.3	0.11	1.4	0.01	0.1	5.7	3.8	2	0.01	622	116	27	0.37	9.9	52	76	103	9.8	9.3	0.37	849	144.4	4.92	102.4	0.177	0.63
			Mean	7.5	14.7	46.4	62	19.6	31.6	198.7	2.65	1228	7.15	1.29	18	5.51	77.1	0.19	2.8	0.09	1.2	0.01	0.2	6.1	4	1.9	0.03	560	107	29	0.4	11.2	66	81	99	10	9	0.19	746	144.3	4.95	101.5	0.199	0.518
			SD	0.25	0.3	0.9	2.4	0.7	0.3	27.8	0.32	68	1.86	0.61	6.4	1.56	6.9	0.08	1	0.04	0.4	0.01	0	0.2	0.1	0.1	0.01	87	12	7	0.02	1.2	14	23	8	0.2	0.2	0.23	123	0.9	0.12	1.5	0.038	0.127
		Human serum albumin_0.12 mg/kg (n = 6)	1	7.59	14.4	47	61.9	19	30.7	221.8	2.92	1216	5.44	1.12	20.6	4.16	76.4	0.1	1.8	0.04	0.8	0.01	0.1	6	3.8	1.7	0.07	687	134	30	0.39	10.5	76	97	87	10.1	8.7	0.47	687	144.3	4.98	101.2	0.201	0.43
			2	6.86	13.4	42.4	61.9	19.5	31.6	182.7	2.66	1265	8.3	1.03	12.5	6.85	82.6	0.22	2.6	0.12	1.5	0.01	0.2	5.8	3.7	1.8	0.07	680	107	27	0.44	12.2	85	76	118	9.8	8.6	0.16	914	143.5	5.06	101.8	0.2	0.401
			3	7.43	14.6	46.2	62.2	19.6	31.5	235.8	3.17	1062	7.96	1.26	15.8	6.45	80.9	0.14	1.7	0.07	0.8	0.01	0.1	6.4	4.1	1.8	0.03	510	94	22	0.43	11.1	89	70	84	10.4	9.3	0.52	704	145.1	5.13	101.3	0.175	0.463
			4	7.44	14.5	45.9	61.8	19.5	31.6	221.9	2.98	1326	11.43	1.55	13.5	9.44	82.6	0.23	2	0.08	0.7	0.02	0.2	6.4	4	1.7	0.03	608	88	18	0.44	11.4	85	101	123	10.3	8.9	1.71	551	144.9	4.67	102	0.189	0.487
			5	7.83	15.2	48.5	61.9	19.4	31.4	217.5	2.78	1106	6.34	0.5	7.9	5.5	86.7	0.2	3.1	0.05	0.8	0.01	0.1	6.2	3.9	1.7	0.02	561	67	25	0.43	11	87	173	94	10.8	9.1	0.02	334	146.5	4.52	102.4	0.188	0.34
			6	7.06	14.1	44	62.4	20	32.1	257.1	3.64	1047	9.35	1.9	20.4	7.07	75.6	0.21	2.2	0.09	1	0.02	0.2	6	3.8	1.7	0.05	839	119	35	0.41	9.2	70	45	91	10	8.8	0	724	145	4.95	104.9	0.174	0.22
			Mean	7.37	14.4	45.7	62	19.5	31.5	222.8	3.03	1170	8.14	1.23	15.1	6.58	80.8	0.18	2.2	0.08	0.9	0.01	0.2	6.1	3.9	1.7	0.05	648	102	26	0.42	10.9	82	94	100	10.2	8.9	0.48	652	144.9	4.89	102.3	0.188	0.39
			SD	0.35	0.6	2.2	0.2	0.3	0.5	24.4	0.35	115	2.14	0.48	4.9	1.76	4.2	0.05	0.5	0.03	0.3	0.01	0.1	0.2	0.1	0.1	0.02	116	24	6	0.02	1	7	44	17	0.4	0.3	0.64	194	1	0.24	1.4	0.012	0.098
	SD rats (Female)	Vehicle control_0.9% saline (n = 5)	1	7.15	14.2	44	61.6	19.8	32.2	169	2.36	1245	3.38	0.4	11.8	2.82	83.5	0.09	2.8	0.05	1.6	0	0.1	6.2	4.2	2.1	0.07	324	80	27	0.39	14.7	107	121	116	10.2	6.7	0.44	633	141.7	4.37	99.5	0.263	0.198
			2	6.53	13.4	40.5	62	20.6	33.2	162.5	2.49	1153	2.35	0.23	9.6	2.03	86.6	0.06	2.5	0.02	1	0	0.1	6.1	4.2	2.2	0.07	356	89	27	0.47	26.1	66	37	121	9.8	7.8	0	604	141	4.62	101.1	0.245	0.281
			3	7.7	14.9	44.9	58.3	19.4	33.3	159.4	2.07	1382	3.98	0.57	14.3	3.22	80.9	0.11	2.8	0.07	1.6	0	0.1	6.2	4.2	2.1	0.07	326	80	27	0.4	14.9	108	122	116	10.3	6.8	0.32	637	140.4	4.32	99.5	0.22	0.172
			4	6.88	13.4	40.6	59	19.5	33	117.8	1.71	519	2.86	0.34	11.8	2.38	83.3	0.06	2.1	0.07	2.5	0	0	5.9	3.9	1.9	0.06	413	77	23	0.41	17.7	87	64	97	10.1	7.7	0.55	552	140.1	4.29	100.8	0.132	0.336
			5	7.43	14.5	42.7	57.6	19.5	33.9	175.6	2.37	679	4.83	0.71	14.6	3.79	78.6	0.15	3	0.13	2.6	0.01	0.1	6.1	4.2	2.2	0.07	355	89	27	0.47	26	66	37	120	9.8	7.8	0.38	606	140.8	4.62	100.1	0.248	0.278
			Mean	7.14	14.1	42.5	59.7	19.8	33.1	156.9	2.2	996	3.48	0.45	12.4	2.85	82.6	0.09	2.6	0.07	1.9	0	0.1	6.1	4.1	2.1	0.07	355	83	26	0.43	19.9	87	76	114	10	7.4	0.34	606	140.8	4.44	100.2	0.221	0.253
			SD	0.46	0.7	2	2	0.5	0.6	22.7	0.31	375	0.97	0.19	2.1	0.69	3	0.04	0.4	0.04	0.7	0	0	0.1	0.1	0.1	0	36	6	2	0.04	5.8	21	43	10	0.2	0.6	0.21	34	0.6	0.16	0.7	0.052	0.067
		Polysorbate20_0.02 mg/kg (n = 5)	1	7	14.2	42.9	61.3	20.3	33.1	173.9	2.48	805	4.86	0.94	19.2	3.51	72.2	0.06	1.3	0.33	6.7	0	0.1	5.8	3.7	1.8	0.02	426	109	35	0.41	14.5	73	36	118	9.6	7.5	0	784	142.2	4.07	101.8	0.183	0.306
			2	7.14	14.6	44.7	62.7	20.4	32.6	165.1	2.31	1210	6.98	0.53	7.6	6.18	88.5	0.13	1.8	0.1	1.4	0.01	0.1	6.4	4.1	1.8	0.03	612	101	28	0.51	17.5	89	42	116	10.2	7.4	0.12	745	142.9	4.15	102.9	0.218	0.249
			3	6.55	13.4	38.9	59.4	20.4	34.3	173.9	2.66	104	4.61	0.86	18.7	3.53	76.7	0.12	2.6	0.07	1.6	0	0.1	5.7	3.8	2	0.04	562	80	21	0.52	15.8	82	39	127	9.9	7.5	0.08	490	140.4	4.1	101.2	0.229	0.232
			4	6.19	12.8	40.8	65.9	20.6	31.3	120.1	1.94	1021	0.99	0.17	17.5	0.74	75.2	0.03	2.6	0.02	2.2	0.01	0.9	6.3	4.3	2.1	0.02	367	109	29	0.42	17.8	95	77	148	10.3	7.7	0.26	840	141.8	4.8	102.6	0.211	0.476
			5	6.72	13.9	43.1	64.2	20.6	32.2	221.5	3.3	1151	3.75	0.51	13.6	3.02	80.4	0.08	2.1	0.12	3.1	0	0.1	6.1	4.2	2.2	0.03	449	84	22	0.41	12.3	90	44	111	9.8	6.4	0.37	557	140.7	4.34	103.8	0.214	0.291
			Mean	6.72	13.8	42.1	62.7	20.5	32.7	170.9	2.54	858	4.24	0.6	15.3	3.4	78.6	0.08	2.1	0.13	3	0	0.3	6.1	4	2	0.03	483	97	27	0.45	15.6	86	48	124	10	7.3	0.17	683	141.6	4.29	102.5	0.211	0.311
			SD	0.38	0.7	2.3	2.5	0.1	1.1	36	0.5	449	2.17	0.31	4.8	1.94	6.3	0.04	0.6	0.12	2.2	0.01	0.4	0.3	0.3	0.2	0.01	101	14	6	0.06	2.3	9	17	15	0.3	0.5	0.15	152	1	0.3	1	0.017	0.097
		Polysorbate20_0.1 mg/kg (n = 5)	1	6.84	14.4	43.1	63	21.1	33.5	157.3	2.3	1143	3.33	0.33	9.8	2.84	85.2	0.05	1.5	0.1	2.9	0	0.1	5.8	3.9	2.1	0.06	419	79	21	0.43	14.8	87	53	102	10.1	7.8	0	423	142.8	4.47	103.5	0.376	0.46
			2	7.22	14.4	43.1	59.7	19.9	33.4	164.6	2.28	817	4.42	0.5	11.3	3.73	84.3	0.07	1.5	0.11	2.4	0	0.1	6.9	4.6	2	0.07	379	62	35	0.43	17.2	83	58	107	10.8	6.8	0	292	142.4	3.94	103.5	0.198	0.35
			3	7.02	13.7	41	58.4	19.5	33.4	197.7	2.82	1327	7.37	0.81	11	6.32	85.7	0.11	1.4	0.06	0.8	0.01	0.2	6.3	4	1.7	0.06	538	74	26	0.44	14.6	104	52	113	10.4	7.1	0.47	359	142.5	4.43	104.3	0.235	0.317
			4	6.96	13.4	41.1	59.1	19.3	32.7	121	1.74	1476	8.56	1.45	16.9	6.84	79.9	0.18	2.1	0.06	0.7	0.01	0.1	5.8	3.5	1.5	0.01	369	121	49	0.39	14.3	84	40	98	9.8	8	0	658	141.9	4.88	102.6	0.253	0.433
			5	7.26	13.9	42	57.8	19.1	33	118.9	1.64	1278	4.42	0.4	9	3.89	88.2	0.06	1.3	0.04	0.9	0	0.1	5.7	3.7	1.9	0.04	536	127	25	0.48	18.8	77	40	100	9.7	7.7	0.57	936	138.9	4.76	100.9	0.173	0.363
			Mean	7.06	14	42.1	59.6	19.8	33.2	151.9	2.16	1208	5.62	0.7	11.6	4.72	84.7	0.09	1.6	0.07	1.5	0	0.1	6.1	3.9	1.8	0.05	448	93	31	0.43	15.9	87	49	104	10.2	7.5	0.21	534	141.7	4.5	103	0.247	0.385
			SD	0.18	0.4	1	2	0.8	0.3	32.9	0.48	249	2.23	0.46	3.1	1.75	3	0.05	0.3	0.03	1	0.01	0	0.5	0.4	0.2	0.02	83	29	11	0.03	2	10	8	6	0.5	0.5	0.29	264	1.6	0.36	1.3	0.079	0.06
		Polysorbate20_0.4 mg/kg (n = 5)	1	7.24	14.9	44.6	61.6	20.6	33.4	176.2	2.44	1069	4.69	0.54	11.5	3.94	83.9	0.1	2.1	0.09	1.8	0.01	0.1	6.1	4	1.9	0.02	590	87	30	0.42	16.9	100	31	93	10.5	8	0.03	405	142.9	4.38	101.8	0.299	0.224
			2	7.4	14.4	44.1	59.5	19.5	32.8	151.7	2.05	1436	6.42	0.49	7.7	5.67	88.2	0.14	2.3	0.09	1.4	0.01	0.2	6	4	2	0.06	362	89	21	0.39	13.3	97	25	95	10.3	7.9	0.65	552	142	4.63	100.9	0.193	0.31
			3	6.98	14.3	44	63.1	20.5	32.4	164.3	2.35	969	5.53	0.55	10	4.67	84.5	0.2	3.6	0.06	1.1	0.01	0.2	6.1	4	1.9	0.03	321	91	26	0.47	15.4	83	37	118	9.8	7.5	0	554	141.8	4.31	102	0.204	0.194
			4	7.51	14.5	44.6	59.4	19.3	32.6	181.4	2.41	1150	9.78	1.62	16.6	7.27	74.3	0.19	2	0.65	6.6	0.03	0.3	5.9	3.7	1.7	0	389	98	31	0.36	10.4	63	113	114	9.9	7.3	0.29	484	141.3	4.22	98.8	0.219	0.194
			5	7.35	14.8	44.8	61	20.1	33	171.5	2.33	1194	2.99	0.53	17.6	2.32	77.4	0.07	2.2	0.07	2.3	0	0.1	6.1	3.8	1.7	0.05	503	95	19	0.42	11.3	90	32	98	9.9	6.8	0.62	462	141.3	4.66	104.5	0.142	0.361
			Mean	7.3	14.6	44.4	60.9	20	32.8	169	2.32	1164	5.88	0.75	12.7	4.77	81.7	0.14	2.4	0.19	2.6	0.01	0.2	6	3.9	1.8	0.03	433	92	25	0.41	13.5	87	48	104	10.1	7.5	0.32	491	141.9	4.44	101.6	0.211	0.257
			SD	0.2	0.3	0.3	1.5	0.6	0.4	11.5	0.16	175	2.52	0.49	4.3	1.85	5.7	0.06	0.7	0.26	2.3	0.01	0.1	0.1	0.1	0.1	0.02	111	4	5	0.04	2.7	15	37	12	0.3	0.5	0.31	63	0.7	0.2	2.1	0.057	0.075
		Human serum albumin_0.06 mg/kg (n = 5)	1	7.65	14.5	44.4	58.1	19	32.6	127.3	1.66	1164	4.45	0.78	17.6	3.33	74.9	0.25	5.6	0.05	1.1	0	0.1	6.2	4	1.8	0.06	446	82	29	0.42	15.7	83	53	130	10.3	7.6	0.14	352	140.1	4.2	101.3	0.182	0.357
			2	8.23	15.8	47.1	57.3	19.2	33.4	101	1.23	948	5.5	0.54	9.9	4.79	87.1	0.07	1.2	0.07	1.3	0	0.1	6	3.9	1.9	0.04	325	81	32	0.39	17.2	83	53	108	10.2	7.3	0	565	140.9	4.33	101.9	0.192	0.327
			3	6.9	14.2	41.7	60.4	20.5	33.9	157	2.27	1211	4.48	0.51	11.4	3.79	84.6	0.06	1.3	0.08	1.8	0.01	0.2	6.1	3.9	1.8	0.05	405	73	29	0.39	12.2	86	33	106	10.2	7.6	0.71	331	142.2	4.78	103.2	0.139	0.976
			4	7.33	14.8	45.4	62	20.2	32.6	181.8	2.48	1189	5.46	0.46	8.5	4.85	88.8	0.07	1.3	0.05	1	0	0.1	6.1	3.9	1.8	0.03	436	76	37	0.37	14.5	101	74	106	10.4	8	0.04	404	140.9	4.56	102	0.265	0.761
			5	7.23	14.4	44.4	61.4	19.9	32.5	148.3	2.05	974	3.64	0.51	14	2.99	82.2	0.07	2	0.06	1.6	0	0	5.7	3.8	2	0.02	600	98	39	0.4	13.5	79	49	116	10.3	8.3	0.11	506	141.4	4.81	103.1	0.157	0.43
			Mean	7.47	14.7	44.6	59.8	19.8	33	143.1	1.94	1097	4.71	0.56	12.3	3.95	83.5	0.1	2.3	0.06	1.4	0	0.1	6	3.9	1.9	0.04	442	82	33	0.39	14.6	86	52	113	10.3	7.8	0.2	432	141.1	4.54	102.3	0.187	0.57
			SD	0.5	0.6	2	2.1	0.6	0.6	30.6	0.5	126	0.78	0.13	3.6	0.84	5.4	0.08	1.9	0.01	0.3	0	0.1	0.2	0.1	0.1	0.02	100	10	5	0.02	1.9	9	15	10	0.1	0.4	0.29	101	0.8	0.27	0.8	0.048	0.285
		Human serum albumin_0.12 mg/kg (n = 5)	1	7.33	15	45.5	62.1	20.5	33	187.5	2.56	1164	3.91	0.33	8.5	3.39	86.8	0.09	2.3	0.06	1.5	0	0.1	6.1	3.9	1.8	0.01	564	84	37	0.48	18.7	102	89	105	10.5	8.2	0.46	480	140.1	4.68	100.9	0.245	0.536
			2	7.01	13.7	42.1	60	19.5	32.5	163.1	2.33	1022	5.63	1.05	18.6	4.37	77.6	0.11	1.9	0.09	1.6	0	0.1	5.8	3.8	1.9	0.04	385	69	28	0.46	18.9	74	64	125	10.1	8.1	0.5	203	141.1	3.63	100.7	0.158	0.648
			3	7.1	14.3	44.3	62.5	20.1	32.2	144.8	2.04	1338	4.35	0.52	12.1	3.63	83.6	0.11	2.5	0.06	1.3	0	0.1	6.1	4	1.9	0.07	573	105	27	0.42	17.9	81	41	105	10.5	8.3	0.74	888	141.3	4.96	102.3	0.175	0.353
			4	7.77	15.3	46.5	59.8	19.6	32.9	156.2	2.01	1191	3.43	0.61	17.8	2.68	77.9	0.09	2.6	0.05	1.3	0	0.1	6.5	4.3	2	0.07	517	69	26	0.42	13.3	127	65	130	10.7	7.8	0	381	141.4	4.38	101.8	0.177	0.641
			5	7.28	14.3	43.6	59.8	19.7	32.9	147.4	2.02	1370	4.58	0.65	14.2	3.77	82.4	0.06	1.4	0.07	1.6	0	0	6.5	4.2	1.8	0.01	334	94	30	0.38	15.5	105	60	137	10.4	7.6	0.45	591	142	4.53	101.7	0.159	0.373
			Mean	7.3	14.5	44.4	60.8	19.9	32.7	159.8	2.19	1217	4.38	0.63	14.2	3.57	81.7	0.09	2.1	0.07	1.5	0	0.1	6.2	4	1.9	0.04	475	84	30	0.43	16.9	98	64	120	10.4	8	0.43	509	141.2	4.44	101.5	0.183	0.51
			SD	0.29	0.6	1.7	1.3	0.4	0.3	17.1	0.25	141	0.83	0.26	4.2	0.61	3.9	0.02	0.5	0.02	0.2	0	0	0.3	0.2	0.1	0.03	109	16	4	0.04	2.4	21	17	15	0.2	0.3	0.27	256	0.7	0.5	0.7	0.036	0.142
				0
